# Supplementary material
Source: publisher figshare collection journal article supplement (https://sage.figshare.com/ndownloader/files/23454467)
Supplement: Supplementary file 1 [file 23454467]

## Consolidated criteria for reporting qualitative studies (COREQ): 32-item checklist

Developed from: Tong, A., Sainsbury, P., & Craig, J. (2007). Consolidated criteria for reporting qualitative research (COREQ): a 32-item checklist for interviews and focus groups. *International Journal for Quality in Health Care*, 19(6), 349 – 357.

| <b>The Experience of Returning Home after Surviving Cardiac Arrest: A Narrative Inquiry</b> |                                                                                                                                           |                                                                                                                                                          |
|---------------------------------------------------------------------------------------------|-------------------------------------------------------------------------------------------------------------------------------------------|----------------------------------------------------------------------------------------------------------------------------------------------------------|
| No. Item                                                                                    | Guide questions/description                                                                                                               | Reported on Page #                                                                                                                                       |
| <b>Domain 1: Research team and reflexivity</b>                                              |                                                                                                                                           |                                                                                                                                                          |
| Personal Characteristics                                                                    |                                                                                                                                           |                                                                                                                                                          |
| 1. Interviewer/facilitator                                                                  | Which author/s conducted the interview or focus group?                                                                                    | Gunilla Haydon                                                                                                                                           |
| 2. Credentials                                                                              | What were the researcher's credentials? E.g. PhD, MD                                                                                      | Gunilla Haydon BN(honours)<br>RN PhD Candidate<br><br>Pamela van der Riet RN PhD<br>Associate Professor<br><br>Kerry Inder RN PhD<br>Associate Professor |
| 3. Occupation                                                                               | What was their occupation at the time of the study?                                                                                       | Gunilla Haydon Lecturer<br>Pamela van der Riet<br>level D lecturer<br>Kerry Inder Deputy<br>Head of School – Research<br>School of Nursing & Midwifery   |
| 4. Gender                                                                                   | Was the researcher male or female?                                                                                                        | Pg. 4 Sampling and<br>Recruitment "...first author<br>and her interest in survival...."                                                                  |
| 5. Experience and training                                                                  | What experience or training did the researcher have?                                                                                      | All authors have multiple<br>publications and completed<br>research projects                                                                             |
| Relationship with participants                                                              |                                                                                                                                           |                                                                                                                                                          |
| 6. Relationship established                                                                 | Was a relationship established prior to study commencement?                                                                               | Pg. 4 Sampling and<br>Recruitment "The researchers<br>did not know any of the<br>participants prior to interview<br>..."                                 |
| 7. Participant knowledge of the interviewer                                                 | What did the participants know about the researcher? e.g. personal goals, reasons for doing the research                                  | This was presented in the<br>Participant information sheet<br>and Consent Form.                                                                          |
| 8. Interviewer characteristics                                                              | What characteristics were reported about the interviewer/facilitator? e.g. Bias, assumptions, reasons and interests in the research topic | Pg. 5 Data Collection "The<br>first author, who has<br>experience in intensive care<br>and education conducted<br>the individual..."                     |
| <b>Methods Domain 2: study design</b>                                                       |                                                                                                                                           |                                                                                                                                                          |
| Theoretical framework                                                                       |                                                                                                                                           |                                                                                                                                                          |
| 9. Methodological orientation and Theory                                                    | What methodological orientation was stated to                                                                                             | Pg. 3 Methods & Design<br>Narrative Inquiry                                                                                                              |

|                                 |                                                                                                            |                                                                                                                                                                                                                                                                                                                                                                                                                                                                                                                                                                                                |
|---------------------------------|------------------------------------------------------------------------------------------------------------|------------------------------------------------------------------------------------------------------------------------------------------------------------------------------------------------------------------------------------------------------------------------------------------------------------------------------------------------------------------------------------------------------------------------------------------------------------------------------------------------------------------------------------------------------------------------------------------------|
|                                 | underpin the study? e.g. grounded theory, discourse analysis, ethnography, phenomenology, content analysis |                                                                                                                                                                                                                                                                                                                                                                                                                                                                                                                                                                                                |
| Participant selection           |                                                                                                            |                                                                                                                                                                                                                                                                                                                                                                                                                                                                                                                                                                                                |
| 10. Sampling                    | How were participants selected? e.g. purposive, convenience, consecutive, snowball                         | Pg. 4 Sampling and Recruitment<br>Purposive and snowball                                                                                                                                                                                                                                                                                                                                                                                                                                                                                                                                       |
| 11. Method of approach          | How were participants approached? e.g. face-to-face, telephone, mail, email                                | Pg. 4 Sampling and Recruitment<br>"All participants initiated contact with the first author..."                                                                                                                                                                                                                                                                                                                                                                                                                                                                                                |
| 12. Sample size                 | How many participants were in the study?                                                                   | Pg. 4 Sampling and Recruitment 17 participants                                                                                                                                                                                                                                                                                                                                                                                                                                                                                                                                                 |
| 13. Non-participation           | How many people refused to participate or dropped out? Reasons?                                            | Pg. 4 Sampling and Recruitment "...no participants withdrew from the inquiry..."                                                                                                                                                                                                                                                                                                                                                                                                                                                                                                               |
| Setting                         |                                                                                                            |                                                                                                                                                                                                                                                                                                                                                                                                                                                                                                                                                                                                |
| 14. Setting of data collection  | Where was the data collected? e.g. home, clinic, workplace                                                 | Pg. 5 Data Collection<br>"fourteen were face to face and three on video chat using Skype."                                                                                                                                                                                                                                                                                                                                                                                                                                                                                                     |
| 15. Presence of nonparticipants | Was anyone else present besides the participants and researchers?                                          | No                                                                                                                                                                                                                                                                                                                                                                                                                                                                                                                                                                                             |
| 16. Description of sample       | What are the important characteristics of the sample? e.g. demographic data, date                          | Pg. 5 Participants "Level of education spanned from high school to doctoral studies, and employment was equally broad, including self-employment, home care duties, office work, academia and health professions. The experience of a CA occurred from three months to 36 years prior to the interview. Twelve participants experienced an out of hospital CA; eight during exercise (gardening, jogging, surfing, playing golf and team sports) and four during sedentary activities at home or in the community. Five participants experienced their CA in hospital." Also listed in a table |
| Data collection                 |                                                                                                            |                                                                                                                                                                                                                                                                                                                                                                                                                                                                                                                                                                                                |

|                                    |                                                                               |                                                                                                                                                                                                      |
|------------------------------------|-------------------------------------------------------------------------------|------------------------------------------------------------------------------------------------------------------------------------------------------------------------------------------------------|
| 17. Interview guide                | Were questions, prompts, guides provided by the authors? Was it pilot tested? | Pg. 5-6 Data collection<br>“Questions such as “Tell me about coming home?” and “What was the biggest difference in ‘before’ and ‘after’ the CA in returning home?”                                   |
| 18. Repeat interviews              | Were repeat interviews carried out? If yes, how many?                         | Pg. 6 Data Collection “Four participants took part in a second interview, providing them with the opportunity to add information included in the inquiry”                                            |
| 19. Audio/visual recording         | Did the research use audio or visual recording to collect the data?           | Pg. 5 Data Collection<br>“All interviews were audiotaped with participant permission ...”                                                                                                            |
| 20. Field notes                    | Were field notes made during and/or after the interview or focus group?       | Pg. 5 Data Collection “and field notes were completed after the interview.”                                                                                                                          |
| 21. Duration                       | What was the duration of the interviews or focus group?                       | Pg. 5 Data Collection “The duration of first interviews ranged between 52 minutes and 3 hours 49 minutes with a median time of 73 minutes. Second interviews ranged from 44 to 63 minutes.”          |
| 22. Data saturation                | Was data saturation discussed?                                                | Not applicable to Narrative inquiry                                                                                                                                                                  |
| 23. Transcripts returned           | Were transcripts returned to participants for comment and/or correction?      | Pg. 6 Data collection<br>“Transcribed material was returned to the participants for review before analysing commenced.”                                                                              |
| Domain 3: analysis and findings    |                                                                               |                                                                                                                                                                                                      |
| Data analysis                      |                                                                               |                                                                                                                                                                                                      |
| 24. Number of data coders          | How many data coders coded the data?                                          | Not applicable to Narrative inquiry                                                                                                                                                                  |
| 25. Description of the coding tree | Did authors provide a description of the coding tree?                         | Not applicable to Narrative inquiry                                                                                                                                                                  |
| 26. Derivation of themes           | Were themes identified in advance or derived from the data?                   | Pg. 6-7 Data Analysis “Before meetings with co-authors, transcribed interviews and emerging threads were circulated among the authors checking that the threads stem from the transcribed material.” |
| 27. Software                       | What software, if applicable, was used to manage the data?                    | No software used                                                                                                                                                                                     |

|                                  |                                                                                                                                 |                                                                                                                                                             |
|----------------------------------|---------------------------------------------------------------------------------------------------------------------------------|-------------------------------------------------------------------------------------------------------------------------------------------------------------|
| 28. Participant checking         | Did participants provide feedback on the findings?                                                                              | Pg. 5 Data collection “Before and after the main interview contact was maintained by emails and phone calls, consistent with the relational aspects of NI.” |
| Reporting                        |                                                                                                                                 |                                                                                                                                                             |
| 29. Quotations presented         | Were participant quotations presented to illustrate the themes/findings? Was each quotation identified? e.g. participant number | Yes, each quote is followed by a participant number correlating to the participant table                                                                    |
| 30. Data and findings consistent | Was there consistency between the data presented and the findings?                                                              | Pg. 7- 12 Findings                                                                                                                                          |
| 31. Clarity of major themes      | Were major themes clearly presented in the findings?                                                                            | Pg. 7-12 Findings                                                                                                                                           |
| 32. Clarity of minor themes      | Is there a description of diverse cases or discussion of minor themes?                                                          | No                                                                                                                                                          |
